# Supplementary material for: Healing of acute anterior cruciate ligament rupture on MRI and outcomes following non-surgical management with the Cross Bracing Protocol
Source: HighWire-hosted journal article supplement (doi:10.1136/bjsports-2023-106931), 2023-06-14
Supplement: bjsports-2023-106931supp001_data_supplement.pdf [file bjsports-2023-106931supp001_data_supplement.pdf]

Filbay SR, et al. Br J Sports Med 2023;0:1–8. doi:10.1136/bjsports-2023-106931

**Appendix 1. The Cross Bracing Protocol**

| Week | Brace                                                                                  | Aims                                                                                                                                                                                                                                                                                                                                                                                                                  | Physiotherapy-supervised rehabilitation                                                                                                                                                                                                                                                                                                                                                                                                                                                                                                  |
|------|----------------------------------------------------------------------------------------|-----------------------------------------------------------------------------------------------------------------------------------------------------------------------------------------------------------------------------------------------------------------------------------------------------------------------------------------------------------------------------------------------------------------------|------------------------------------------------------------------------------------------------------------------------------------------------------------------------------------------------------------------------------------------------------------------------------------------------------------------------------------------------------------------------------------------------------------------------------------------------------------------------------------------------------------------------------------------|
| 1-4  | ROM brace fitted and locked at 90 degrees<br><br>NWB with crutches or mobility scooter | <ul style="list-style-type: none"> <li>Maintain knee flexion at 90° in brace 24/7</li> <li>Minimise local and global muscle atrophy</li> <li>Control swelling and pain</li> <li>DVT risk mitigation: Hydration, calf pump exercises and anticoagulation (Rivaroxaban 10mg daily)</li> <li>Counsel re anticipated initial discomfort</li> <li>No NSAIDs medications; no aspiration/drainage of hemarthrosis</li> </ul> | <ul style="list-style-type: none"> <li>Manual therapy weekly, maintaining 90° knee flexion</li> <li>Cryotherapy</li> </ul> <p>Rehabilitation exercises:</p> <ul style="list-style-type: none"> <li>Quadriceps and hamstring co-contractions.</li> <li>Calf Theraband plantarflexion</li> <li>Hip abduction and extension</li> <li>Contralateral limb: single leg press, leg extension, hamstring curls, calf raise, glute bridge, core activation.</li> <li>Upper body strengthening.</li> <li>Ski Ergometer</li> <li>Grinder</li> </ul> |

Filbay SR, et al. Br J Sports Med 2023;0:1–8. doi:10.1136/bjsports-2023-106931

|     |                                                                                                                 |                                                                                                                                                                                                                                            |                                                                                                                                                                                                                                                                                                                                                                                                                                                                                                                                                                                                                                  |
|-----|-----------------------------------------------------------------------------------------------------------------|--------------------------------------------------------------------------------------------------------------------------------------------------------------------------------------------------------------------------------------------|----------------------------------------------------------------------------------------------------------------------------------------------------------------------------------------------------------------------------------------------------------------------------------------------------------------------------------------------------------------------------------------------------------------------------------------------------------------------------------------------------------------------------------------------------------------------------------------------------------------------------------|
| 5-6 | <p>Week 5 = 60 degrees to 90 degrees</p> <p>Week 6 = 45 degrees to 90 degrees</p> <p>NWB with crutches</p>      | <ul style="list-style-type: none"> <li>Minimise local and global muscle atrophy</li> <li>Maintain specified knee ROM</li> <li>DVT risk mitigation: Hydration, calf pump exercises and anticoagulation (Rivaroxaban 10mg daily).</li> </ul> | <ul style="list-style-type: none"> <li>Manual therapy and exercises weekly in specified range (brace can come off for physiotherapy).</li> </ul> <p>Rehabilitation exercises:</p> <ul style="list-style-type: none"> <li>Quadriceps and hamstring co-contractions at varying angles</li> <li>Continue calf Theraband plantarflexion</li> <li>Hip abduction and extension with ankle weights or Theraband</li> <li>Continue Contralateral limb; single leg press, leg extension, hamstring curls, calf raise, glute bridge, core activation</li> <li>Upper body strengthening.</li> <li>Ski Ergometer</li> <li>Grinder</li> </ul> |
| 7-8 | <p>Week 7 = 30 degrees to FULL FLEXION°</p> <p>Week 8 = 20 degrees to FULL FLEXION</p> <p>PWB with crutches</p> | <ul style="list-style-type: none"> <li>Minimise local and global muscle atrophy</li> <li>Maintain specified knee ROM</li> <li>DVT risk mitigation: Hydration, calf pump exercises and anticoagulation (Rivaroxaban 10mg daily).</li> </ul> | <ul style="list-style-type: none"> <li>Manual therapy and exercises weekly in specified range;</li> <li>Gait retraining.</li> </ul> <p>Rehabilitation exercises, as per week 5-6 plus;</p> <ul style="list-style-type: none"> <li>Wall squats/holds (Week 7=45°, Week 8=30°).</li> <li>Body weight squats within brace limits</li> </ul>                                                                                                                                                                                                                                                                                         |
| 9   | <p>Week 9 = 10 degrees to FULL FLEXION.</p>                                                                     | <ul style="list-style-type: none"> <li>Increase knee ROM</li> <li>Overcome anticipated fixed flexion contracture</li> </ul>                                                                                                                | <ul style="list-style-type: none"> <li>Manual therapy and exercises weekly in specified range.</li> <li>Gait retraining.</li> </ul> <p>Rehabilitation exercises:</p>                                                                                                                                                                                                                                                                                                                                                                                                                                                             |

Filbay SR, et al. Br J Sports Med 2023;0:1–8. doi:10.1136/bjsports-2023-106931

|       |                                                                                                                       |                                                                                                                                                                             |                                                                                                                                                                                                                                                                                                                                                                                                                                          |
|-------|-----------------------------------------------------------------------------------------------------------------------|-----------------------------------------------------------------------------------------------------------------------------------------------------------------------------|------------------------------------------------------------------------------------------------------------------------------------------------------------------------------------------------------------------------------------------------------------------------------------------------------------------------------------------------------------------------------------------------------------------------------------------|
|       | <p>Week 10 = UNRESTRICTED ROM brace (0-120°+)</p> <p>Wean off crutches. Full weight bearing</p>                       | <ul style="list-style-type: none"> <li>• Increase muscle strength of lower limbs</li> <li>• Improve proprioception</li> <li>• Cease Rivaroxaban anti-coagulation</li> </ul> | <ul style="list-style-type: none"> <li>• Knee range of motion exercises (heel slides).</li> <li>• Pilates reformer/ leg press</li> <li>• Body weight squats</li> <li>• Bridges - hamstring and gluteal</li> <li>• Crab walks/ monster walks</li> <li>• Calf raises</li> <li>• Static balance exercises</li> <li>• Exercise bike if able to achieve over 100° flexion.</li> <li>• Upper body strengthening.</li> <li>• Grinder</li> </ul> |
| 10-12 | <p>Unrestricted ROM brace</p> <p>Full weight bearing</p> <p>End of week 12: Medical consultation and 12-week MRI.</p> | <ul style="list-style-type: none"> <li>• Increase knee ROM</li> <li>• Increase muscle strength</li> <li>• Improve proprioception</li> </ul>                                 | <ul style="list-style-type: none"> <li>• Weekly manual therapy and exercises.</li> <li>• Gait retraining.</li> </ul> <p>Rehabilitation exercises, as per week 9 plus;</p> <ul style="list-style-type: none"> <li>• Leg press (single leg)</li> <li>• Hamstring curl machine</li> <li>• Standing and seated calf raise machine</li> <li>• Static balance exercises.</li> <li>• Exercise bike</li> </ul>                                   |
| 13-14 | <p>Week 13 = Removal of brace. Formal clinical review and repeat MRI.</p>                                             | <ul style="list-style-type: none"> <li>• Increase muscle strength</li> <li>• Improve proprioception</li> </ul>                                                              | <ul style="list-style-type: none"> <li>• Weekly manual therapy and exercises.</li> <li>• Gait retraining.</li> </ul> <p>Rehabilitation exercises:</p> <ul style="list-style-type: none"> <li>• Continue/progress hamstring and quadriceps strengthening</li> <li>• Addition of single leg squatting/Bulgarian squats</li> <li>• Lunges (half range)</li> <li>• Dynamic balance exercises</li> </ul>                                      |

Filbay SR, et al. Br J Sports Med 2023;0:1–8. doi:10.1136/bjsports-2023-106931

|       |                                                                                           |                                                                                                                                                                                    |                                                                                                                                                                                                                                                                                                                                                                                                                                                                                                                                                                                                                                                                                                                                               |
|-------|-------------------------------------------------------------------------------------------|------------------------------------------------------------------------------------------------------------------------------------------------------------------------------------|-----------------------------------------------------------------------------------------------------------------------------------------------------------------------------------------------------------------------------------------------------------------------------------------------------------------------------------------------------------------------------------------------------------------------------------------------------------------------------------------------------------------------------------------------------------------------------------------------------------------------------------------------------------------------------------------------------------------------------------------------|
|       | <p>Full weight bearing</p> <p>Brace is worn in high risk environments from week 13-16</p> |                                                                                                                                                                                    | <ul style="list-style-type: none"> <li>• Jogging on spot/mini tramp</li> <li>• Light Skipping</li> <li>• Exercise bike</li> <li>• Upper body</li> <li>• Grinder</li> </ul>                                                                                                                                                                                                                                                                                                                                                                                                                                                                                                                                                                    |
| 15-16 | No brace, full weight bearing.                                                            | <ul style="list-style-type: none"> <li>• Increase muscle strength</li> <li>• Improve proprioception</li> <li>• Introduce Running (must meet return to running criteria)</li> </ul> | <ul style="list-style-type: none"> <li>• Manual therapy</li> <li>• Running analysis</li> </ul> <p>Criteria for commencing slow running:</p> <ul style="list-style-type: none"> <li>• No effusion</li> <li>• Full ROM</li> <li>• Quadriceps and hamstring strength &gt;80% LSI</li> <li>• Star excursion balance test &gt;90% LSI</li> </ul> <p>Rehabilitation exercises:</p> <p>Continue/progress previous strength and dynamic balance exercises.</p> <ul style="list-style-type: none"> <li>• Addition of walking lateral movements e.g. crab walking, side stepping, grapevines etc.</li> <li>• Addition of jumping/landing</li> <li>• Exercise bike</li> <li>• Swimming</li> <li>• Cross trainer/elliptical</li> <li>• Grinder</li> </ul> |

Filbay SR, et al. Br J Sports Med 2023;0:1–8. doi:10.1136/bjsports-2023-106931

|    |                                |                                                                                                                                                    |                                                                                                                                                                                                                                                                                                                                                                                                                                                                                                                                    |
|----|--------------------------------|----------------------------------------------------------------------------------------------------------------------------------------------------|------------------------------------------------------------------------------------------------------------------------------------------------------------------------------------------------------------------------------------------------------------------------------------------------------------------------------------------------------------------------------------------------------------------------------------------------------------------------------------------------------------------------------------|
|    |                                |                                                                                                                                                    | <ul style="list-style-type: none"> <li>• Straight line running only (if meeting above criteria)</li> </ul>                                                                                                                                                                                                                                                                                                                                                                                                                         |
| 17 | No brace, full weight bearing. | <ul style="list-style-type: none"> <li>• Increase muscle strength</li> <li>• Improve proprioception</li> <li>• Introduce faster running</li> </ul> | <ul style="list-style-type: none"> <li>• Manual therapy as required</li> </ul> <p>Criteria for progression to faster running:</p> <ul style="list-style-type: none"> <li>• Completion of slower running with no pain or effusion</li> </ul> <p>Rehabilitation exercises:</p> <ul style="list-style-type: none"> <li>• Continue/progress previous exercises</li> <li>• Introduce faster running (if meeting above criteria)</li> </ul>                                                                                              |
| 18 | No brace, full weight bearing. | <ul style="list-style-type: none"> <li>• Increase muscle strength/ proprioception</li> <li>• Introduce Agility exercises</li> </ul>                | <ul style="list-style-type: none"> <li>• Manual therapy as required</li> </ul> <p>Criteria for commencing agility exercises:</p> <ul style="list-style-type: none"> <li>• Adequate control with jumping and landing, double and single leg</li> <li>• Completion of faster straight line running with no pain or effusion.</li> </ul> <p>Rehabilitation exercises:</p> <ul style="list-style-type: none"> <li>• Continue/progress previous exercises</li> <li>• Introduce agility exercises (if meeting above criteria)</li> </ul> |
| 19 | No brace, full weight bearing. | <ul style="list-style-type: none"> <li>• Increase muscle strength/ proprioception</li> <li>• Introduce hopping</li> </ul>                          | <ul style="list-style-type: none"> <li>• Manual therapy as required</li> </ul> <p>Rehabilitation exercises:</p> <ul style="list-style-type: none"> <li>• Continue/progress previous exercises</li> <li>• Introduce hopping exercises</li> </ul>                                                                                                                                                                                                                                                                                    |
| 20 | No brace, full weight bearing. | <ul style="list-style-type: none"> <li>• Increase and maintain muscle strength/ proprioception</li> </ul>                                          | <ul style="list-style-type: none"> <li>• Manual therapy as required</li> </ul>                                                                                                                                                                                                                                                                                                                                                                                                                                                     |

Filbay SR, et al. Br J Sports Med 2023;0:1–8. doi:10.1136/bjsports-2023-106931

|     |                                |                                                                                                                                                                                                                           |                                                                                                                                                                                                                                                                                                                                                                                                                                                                                                           |
|-----|--------------------------------|---------------------------------------------------------------------------------------------------------------------------------------------------------------------------------------------------------------------------|-----------------------------------------------------------------------------------------------------------------------------------------------------------------------------------------------------------------------------------------------------------------------------------------------------------------------------------------------------------------------------------------------------------------------------------------------------------------------------------------------------------|
|     |                                | <ul style="list-style-type: none"> <li>Consider return to training from week 20 onwards</li> </ul>                                                                                                                        | <p>Criteria for return to training</p> <ul style="list-style-type: none"> <li>Single leg hop &gt;90% LSI</li> <li>Knee extension strength &gt;90% LSI</li> <li>Hamstring strength &gt;90% LSI</li> <li>Good dynamic knee control on single leg land from step</li> <li>Star excursion balance test &gt;90% LSI</li> </ul> <p>Rehabilitation exercises:</p> <ul style="list-style-type: none"> <li>Continue/progress previous exercises</li> <li>Return to training (if meeting above criteria)</li> </ul> |
| 26+ | No brace, full weight bearing. | <ul style="list-style-type: none"> <li>Increase and maintain muscle strength/ proprioception</li> <li>Consider return to sport around 9-12 months (the decision to return to sport is goal and criteria based)</li> </ul> | <ul style="list-style-type: none"> <li>Manual therapy as required</li> </ul> <p>Criteria for return to play</p> <ul style="list-style-type: none"> <li>Triple Hop/lateral hop/ single hop &gt;90% LSI</li> <li>Single leg press 1.8x BW</li> <li>Star excursion balance test &gt;90% LSI</li> </ul> <p>Rehabilitation exercises:</p> <ul style="list-style-type: none"> <li>Continue/progress previous exercises</li> </ul> <p>Return to play (if meeting above criteria)</p>                             |

ROM: Range of movement, NSAIDs: Non steroidal anti inflammatory drugs, N/PWB: Non/ Partial weight bearing, DVT: Deep vein thrombosis, LSI: Limb symmetry index; BW: Body weight.
