# Supplementary material for: Healing of acute anterior cruciate ligament rupture on MRI and outcomes following non-surgical management with the Cross Bracing Protocol
Source: PubMed Central journal article supplement (PMC10715498; doi:10.1136/bjsports-2023-106931), 2023-06-14
Supplement: bjsports-2023-106931supp002.pdf [file bjsports-2023-106931supp002.pdf]

## Appendix 2. Participant outcomes stratified by healing status, excluding n=7 participants who re-ruptured their ACL prior to completing outcomes

|                                | All participants<br>(n=73) | Evidence of ACL healing on 3 month MRI |                             |                            |
|--------------------------------|----------------------------|----------------------------------------|-----------------------------|----------------------------|
|                                |                            | ACLOAS<br>Grade 1<br>(n=39)            | ACLOAS<br>Grade 2<br>(n=23) | ACLOAS<br>Grade 3<br>(n=8) |
| Lysholm Scale score            | 95 (90 to 100)             | 99 (94 to 100)                         | 95 (85 to 100)              | 95 (87 to 100)             |
| ACL-QOL score (Total)          | 82 (70 to 94)              | 89 (78 to 96)                          | 71 (61 to 82)               | 76 (66 to 95)              |
| Symptoms / Physical Complaints | 94 (86 to 98)              | 96 (92 to 100)                         | 88 (82 to 96)               | 88 (75 to 96)              |
| Work related concerns          | 100 (93 to 100)            | 100 (98 to 100)                        | 93 (78 to 98)               | 100 (98 to 100)            |
| Rec and sport participation    | 76 (58 to 93)              | 82 (66 to 93)                          | 61 (42 to 80)               | 65 (44 to 90)              |
| Lifestyle                      | 90 (77 to 98)              | 95 (88 to 100)                         | 78 (60 to 93)               | 88 (73 to 98)              |
| Social and emotional           | 81 (60 to 94)              | 90 (76 to 94)                          | 72 (52 to 84)               | 73 (63 to 97)              |

For n=2 who did not have an MRI at 3 months, 6 month MRI results are reported (93% of participants had the same ACLOAS score at 3 and 6 months)
