# Supplementary material for: Healing of acute anterior cruciate ligament rupture on MRI and outcomes following non-surgical management with the Cross Bracing Protocol
Source: PubMed Central journal article supplement (PMC10715498; doi:10.1136/bjsports-2023-106931), 2023-06-14
Supplement: bjsports-2023-106931supp003.pdf [file bjsports-2023-106931supp003.pdf]

### Appendix 3. Participant characteristics and outcomes reported separately for people with an ACLOAS Grade 2 and 3, on 3 month MRI

**Table 1: Participant characteristics**

|                                            | All participants<br>(n=80) | Evidence of ACL healing on 3-month MRI |                          |                         |
|--------------------------------------------|----------------------------|----------------------------------------|--------------------------|-------------------------|
|                                            |                            | ACLOAS Grade 1<br>(n=40)               | ACLOAS Grade 2<br>(n=32) | ACLOAS Grade 3<br>(n=8) |
| Age at injury                              | 26 SD 10                   | 27 SD 10                               | 23 SD 9                  | 28 SD 16                |
| Sex (% female)                             | 31 (38)                    | 14 (35)                                | 13 (41)                  | 3 (38)                  |
| Time from injury to brace (days)           | 8 SD 7                     | 6 SD 4                                 | 11 SD 8                  | 21 SD 49                |
| Used private health insurance              | 55 (68)                    | 27 (68)                                | 23 (72)                  | 4 (50)                  |
| <b>Level of pre-injury sport</b>           |                            |                                        |                          |                         |
| Recreational                               | 28 (35)                    | 13 (33)                                | 11 (34)                  | 4 (50)                  |
| Competitive                                | 49 (61)                    | 25 (63)                                | 20 (63)                  | 3 (38)                  |
| Professional                               | 4 (5)                      | 2 (5)                                  | 1 (3)                    | 1 (13)                  |
| Contact mechanism of injury                | 24 (30)                    | 17 (43)                                | 5 (16)                   | 2 (22)                  |
| History of contralateral ACL injury        | 8 (10)                     | 3 (8)                                  | 4 (13)                   | 1 (13)                  |
| Adherent to bracing protocol               | 77 (95)                    | 37 (93)                                | 31 (97)                  | 8 (100)                 |
| PRP injection                              | 14 (17)                    | 5 (13)                                 | 8 (25)                   | 1 (13)                  |
| <b>Concomitant injuries</b>                |                            |                                        |                          |                         |
| MCL injury                                 | 40 (49)                    | 17 (43)                                | 17 (53)                  | 6 (75)                  |
| Meniscal injury                            | 39 (48)                    | 21 (53)                                | 12 (38)                  | 6 (75)                  |
| PLC injury                                 | 31 (38)                    | 20 (50)                                | 5 (16)                   | 6 (75)                  |
| Bone contusion                             | 74 (91)                    | 38 (95)                                | 27 (84)                  | 8 (100)                 |
| Chondral injury                            | 1 (1)                      | 1 (3)                                  | 0 (0)                    | 0 (0)                   |
| Sub-cortical fracture                      | 6 (7)                      | 3 (8)                                  | 3 (9)                    | 0 (0)                   |
| <b>ACL rupture characteristics</b>         |                            |                                        |                          |                         |
| <b>ACL femoral origin intact:</b>          |                            |                                        |                          |                         |
| Lateral displacement of distal remnant     | 8 (10)                     | 8 (20)                                 | 0 (0)                    | 0 (0)                   |
| Anterior displacement of distal remnant    | 9 (11)                     | 6 (15)                                 | 2 (6)                    | 0 (0)                   |
| No displacement of distal remnant*         | 19 (24)                    | 19 (48)                                | 1 (3)                    | 0 (0)                   |
| <b>Partial avulsion of femoral origin:</b> |                            |                                        |                          |                         |
| Lateral displacement of distal remnant     | 10 (12)                    | 1 (3)                                  | 7 (22)                   | 2 (25)                  |
| Anterior displacement of distal remnant    | 23 (29)                    | 3 (8)                                  | 15 (47)                  | 5 (63)                  |
| No displacement of distal remnant*         | 11 (14)                    | 3 (8)                                  | 7 (22)                   | 1 (13)                  |
| Complete avulsion of femoral origin        | 0 (0)                      | 0 (0)                                  | 0 (0)                    | 0 (0)                   |

Data are reported as mean SD (standard deviation) or count (proportion);

For the 2 participants with missing 3 month MRI data, ACLOAS scores were estimated using ACLOAS scores from 6 month MRI (70 out of 75 (93%) participants with 6 months MRI data had the same ACLOAS score at 3 and 6 months)

\*ACL distal remnant remains inside the boundaries of the intercondylar notch;

PRP=platelet-rich plasma; MCL=medial collateral ligament; PLC=posterior lateral corner;

**Table 2. Participant outcomes**

|                                                   | All participants (n=80) | Evidence of ACL healing on 3 month MRI |                       |                      |
|---------------------------------------------------|-------------------------|----------------------------------------|-----------------------|----------------------|
|                                                   |                         | ACLOAS Grade 1 (n=40)                  | ACLOAS Grade 2 (n=32) | ACLOAS Grade 3 (n=8) |
| Lysholm Scale score                               | 95 (89 to 100)          | 98 (94 to 100)                         | 91 (81 to 100)        | 95 (87 to 100)       |
| ACL-QOL score (total)                             | 80 (69 to 93)           | 89 (76 to 96)                          | 70 (57 to 76)         | 76 (66 to 95)        |
| Symptoms / physical complaints                    | 94 (86 to 98)           | 96 (92 to 100)                         | 88 (82 to 96)         | 88 (75 to 96)        |
| Work related concerns                             | 98 (90 to 100)          | 100 (98 to 100)                        | 93 (75 to 99)         | 100 (98 to 100)      |
| Rec and sport participation                       | 68 (54 to 91)           | 82 (65 to 93)                          | 58 (38 to 73)         | 65 (44 to 90)        |
| Lifestyle                                         | 88 (74 to 98)           | 94 (86 to 100)                         | 77 (59 to 88)         | 88 (73 to 98)        |
| Social and emotional                              | 78 (58 to 94)           | 90 (72 to 94)                          | 60 (44 to 79)         | 73 (63 to 97)        |
| 3 month Lachman test                              |                         |                                        |                       |                      |
| No SSD                                            | 64 (80)                 | 40 (100)                               | 23 (72)               | 1 (12.5)             |
| End point with SSD                                | 15 (19)                 | 0 (0)                                  | 9 (28)                | 6 (75)               |
| No endpoint                                       | 1 (1)                   | 0 (0)                                  | 0 (0)                 | 1 (12.5)             |
| 6 month pivot-shift test                          |                         |                                        |                       |                      |
| Normal                                            | 44 (58)                 | 33 (85)                                | 11 (37)               | 0 (0)                |
| Glide                                             | 31 (41)                 | 6 (15)                                 | 18 (60)               | 7 (100)              |
| Jerk                                              | 1 (1)                   | 0 (0)                                  | 1 (3)                 | 0 (0)                |
| Missing, n                                        | 4                       | 1                                      | 2                     | 1                    |
| Return to pre-injury level of sport at 12 months  |                         |                                        |                       |                      |
| Yes                                               | 59 (79)                 | 36 (92)                                | 20 (71)               | 3 (37.5)             |
| No                                                | 16 (21)                 | 3 (8)                                  | 8 (29)                | 5 (62.5)             |
| N/A (crossed-over to ACLR before eligible to RTS) | n=5                     | n=1                                    | n=4                   | n=0                  |
| Underwent arthroscopic surgery                    | 2 (3)                   | 1 (3)                                  | 1 (3)                 | 0 (0)                |
| ACL re-rupture                                    | 11 (14)                 | 4 (10)                                 | 7 (22)                | N/A                  |

For n=2 who did not have an MRI at 3 months, 6 month MRI results are reported (93% of participants had the same ACLOAS score at 3 and 6 months)

Missing data from n=1 for the Lysholm Scale and ACL-QOL (ACLOAS Grade 2)

Non-normally distributed data are presented as median (IQR)

SSD=side to side difference; N/A=not applicable; ACLR=anterior cruciate ligament reconstruction; RTS=return to sport
